# Supplementary material for: Experiences and Lessons Learned from Designing and Testing of an Air System and a Drilling Fluid Circulation System Adapted for Subglacial Bedrock Sampling in Antarctica
Source: Copernicus journal article supplement (doi:10.5194/gi-14-277-2025), 2025-10-22
Supplement: Supplementary file 1 [file Table S1.xlsx]

## Sheet: Sheet1
Time	Pressure(MPa)	Flow rate (Nm3/min)	Air temperature after compressing (℃)	Temperature at the inlet of freezing dryer (℃)	Temperature at the outlet of freezing dryer (℃)	Temperature after first cooler (second cooler worked) (℃)	Temperature after second cooler (second cooler worked)	Temperature after first cooler (first cooler worked) (℃)	Temperature after second cooler (first cooler worked)	Dew point at the inlet of cooler (℃)	Dew point at the outlet of cooler (℃)
2025-01-12 12:26:00	0.83	10.1	77	41	35	37.1	-9.7			18.5	-11.3
2025-01-12 12:31:00	0.86	12.3667	78	42	34	1	-5			18.2	-4.3
2025-01-12 12:37:00	0.77	10.7833	87	40	34			-11.5	-10.1	19.9	-11.4
2025-01-12 12:55:00	0.68	10.15	78	42	38			-9	-6	-4.5	-13.1
2025-01-12 13:08:00	0.86	10.6333	79	42	34			-10.2	-11	14.3	-12
2025-01-12 13:28:00	0.74	10.05	78	41	33			-7.9	-10.4	11.8	-7.5
2025-01-12 13:40:00	0.88	10.0167	78	41	34			-10.6	-9.1	19.3	-12.5
2025-01-12 16:37:00	0.73	9.33333	79	39	36			-8.5	-10.1	2.8	4.6
2025-01-12 16:45:00	0.75	10.1167	86	41	36			-9.7	-10.1	11.8	-10.1
2025-01-12 16:55:00	0.84	10.05	81	41	37			-10	-10.3	16.6	-11.3
2025-01-12 17:04:00	0.76	12	81	10	36	35.8	-9.9			2.1	-12
2025-01-12 17:16:00	0.71	9.66667	86	43	39			-10.1	-5.9	17.8	15
2025-01-12 17:21:00	0.77	10.1167	80	43	38			-11.8	-10.3	19.8	-8.9
2025-01-12 17:30:00	0.96	9.68333	85	43	40			-14.3	-10.4	19.9	-10.9
2025-01-12 17:42:00	0.75	10.6833	88	42	38			-11	-11.9	-7	-8.5
2025-01-12 17:52:00	0.76	10.7167	89	43	38			-13.8	-10.1	11.9	-12
2025-01-12 18:04:00	0.84	10.25	81	42	38			-11.5	-10.4	18.5	-11.9
2025-01-12 20:40:00	0.76	10.1333	77	37	31			-9.7	-8.5	18	-8.2
2025-01-12 20:51:00	0.78	11.0833	78	36	31	9.6	-8.2			19.9	-10.6
2025-01-12 21:13:00	0.75	9.8	77	39	33			-12.4	-6.9	3.2	-4
2025-01-12 21:19:00	0.75	10.3	77	40	33			-13.1	-4.9	11.8	-6.3
2025-01-12 21:27:00	0.8	10.3333	78	38	33			-12	-5.1	15.9	-6.5
2025-01-13 11:06:00	0.71	9.61667	87	43	41			-11.4	-8.1	7.6	-5.4
2025-01-13 11:07:00	0.75	10.5833	88	44	41			-12.7	-7.9	10.8	-8.9
2025-01-13 11:28:00	0.77	11.05	88	44	41	33.9	-8.3			16.5	-6.3
2025-01-13 11:37:00	0.93	10.3167	81	44	41	38.3	-8.7			12.1	-8.9
2025-01-13 11:59:00	0.71	10.2	88	43	38			-17.4	-12.3	13.4	-9.5
2025-01-13 12:06:00	0.78	10.4333	77	43	38			-17.1	-10.6	11.8	-12.6
2025-01-13 14:31:00	0.75	10.5	78	43	39	30.7	-12			10.4	-14.6
2025-01-13 19:50:00	0.76	9.81667	77	43	46	41.7	-7.4			15.2	-2.2
2025-01-13 20:04:00	0.99	9.91667	78	33	34	32.2	-8.2			13.1	-10.2
2025-01-13 20:14:00	0.77	10.75	88	33	33	29.5	-8.5			-2.4	-7.7
2025-01-13 20:25:00	0.79	11.1167	86	34	33	28	-5.1			7.7	-6.6
2025-01-13 21:05:00	0.78	11.0167	77	32	33	28.2	-6.9			3.3	-8.3
2025-01-13 21:11:00	0.79	11.0833	85	32	33	28.4	-5.1			7	-6.8
2025-01-13 21:16:00	0.82	11.1167	78	32	34	28.3	-4.9			8.4	-6.2
2025-01-14 16:11:00	0.84	9.98333	78	35	36	30.1	-9.2			17.5	-21.2
2025-01-14 16:18:00	0.84	11.15	79	35	36	30.9	-7.2			-11.3	-20.7
2025-01-14 16:28:00	0.7	10.6167	84	36	36	29.7	-6.5			4.4	-9.7
2025-01-14 16:37:00	0.74	10.7	78	36	35	31.2	-5.1			11.6	-18.1
2025-01-14 16:46:00	0.76	10.7667	77	35	36	31.9	-5.1			15.8	-15.4
2025-01-14 21:32:00	0.7	10.6833	79	24	26	18.6	-16.9			-1.9	-15.9
2025-01-14 21:57:00	0.72	10.7833	78	25	28	17.6	-15.1			1.2	-19
2025-01-14 22:06:00	0.77	11	87	26	29	20	-8.3			7	-13.1
2025-01-14 22:32:00	0.71	10.2	78	28	32	24.4	-11.2			1.3	-7.9
2025-01-14 22:44:00	0.74	11.0167	87	30	32	25.5	-7.2			7	-9.6
2025-01-14 23:17:00	0.72	10.3333	76	30	33	25.1	-10.1			9.3	-7.4
2025-01-14 23:26:00	0.83	10.4333	80	31	33	25.7	-6.6			11.9	-8.2
2025-01-14 23:36:00	0.77	11.4	78	30	32	27.5	-5.9			-9.7	-8.6
Test data of the air system in Antarctica, corresponding to Figure 8
