# Supplementary material for: Experiences and Lessons Learned from Designing and Testing of an Air System and a Drilling Fluid Circulation System Adapted for Subglacial Bedrock Sampling in Antarctica
Source: Copernicus journal article supplement (doi:10.5194/gi-14-277-2025), 2025-10-22
Supplement: Supplementary file 3 [file Table S2.xlsx]

## Sheet: Sheet1
Time	Pressure (MPa)	Flow rate (L/min)	Temperature of drilling liquid (℃)
2025-02-10 16:45:00	0.23	92
2025-02-11 12:36:00	0.2	71.6667	-5.8
2025-02-12 12:00:00	0.2	75	-7
2025-02-12 15:05:00	0.2	78.3333
2025-02-12 16:31:00	0.209	64.5	-7
2025-02-12 16:51:00	0.2	73.3333	-10.1
2025-02-12 21:15:00	0.2	66.6667	-6.42
2025-02-12 21:34:00	0.21	93.3333	-9.2
2025-02-13 12:07:00		90	-11
2025-02-13 17:00:00		80	-4.5
2025-02-14 10:50:00		80
2025-02-14 20:20:00	0.15	71.6667
2025-02-14 20:45:00	0.15	83.3333
2025-02-15 00:08:00	0.15	72.5
2025-02-15 13:45:00	0.15	76.6667	-14
2025-02-15 13:58:00	0.15	81.3333	-19
2025-02-15 16:25:00	0.16	88.3333	-9.7
2025-02-15 17:29:00	0.21	72	-8
2025-02-15 17:40:00	0.23	87.1667	-6.16
2025-02-15 18:05:00		86.6667	-7.57
2025-02-15 18:16:00		86.6667	-7.1
2025-02-15 18:31:00		81.6667	-7.2
2025-02-15 18:46:00		71.6667	-8.1
2025-02-15 19:50:00	0.21	88.3333	-8.4
2025-02-15 20:10:00		78.3333	-11.5
2025-02-15 20:33:00		81.6667
2025-02-15 20:57:00		90	-12.2
2025-02-15 21:24:00		93.3333	-13.1
2025-02-15 21:26:00	0.2	71.6667	-14
2025-02-15 21:48:00		87.6667	-14.6
2025-02-15 22:08:00		75.8333	-14.6
2025-02-15 22:28:00		84.3333	-15.1
2025-02-16 10:55:00	0.2	84.1667	-15.4
2025-02-16 11:36:00	0.191	81.6667	-8.1
2025-02-16 11:56:00	0.187	77.1667	-7.2
2025-02-16 12:10:00		83.3333	-5.9
2025-02-16 12:36:00		83.3333	-8.2
2025-02-16 12:56:00		76.6667	-6.1
2025-02-16 14:22:00	0.181	82.1667	-5.9
2025-02-16 14:48:00	0.181	85.5	-10.4
2025-02-16 14:48:00		76.6667	-10.8
2025-02-16 15:04:00	0.18	78.8333	-10.4
2025-02-16 15:35:00		83.3333	-10.4
2025-02-16 16:27:00		75	-10.2
2025-02-16 16:27:00	0.192	87.3333	-10.2
2025-02-16 18:00:00		86.6667	-7.6
2025-02-16 19:00:00		71.6667	-7.6
2025-02-16 20:17:00		75	-10.1
2025-02-17 11:10:00	0.16	83.3333	-12.5
2025-02-17 12:19:00		78.6667	-14.6
2025-02-17 12:53:00		93.3333	-10.9
2025-02-17 13:24:00		85	-9.2
2025-02-17 14:33:00		81.3333	-9.1
2025-02-17 15:19:00		83.3333	-10.6
2025-02-17 16:01:00		80.8333	-11
2025-02-17 17:25:00	0.16	80	-11
2025-02-17 18:08:00		80	-9
2025-02-17 18:43:00	0.162	81.3333	-10.7
2025-02-17 18:57:00		75	-9.2
2025-02-17 19:23:00	0.169	84.6667	-10
2025-02-17 19:05:00	0.172	83.1667	-10.5
2025-02-17 19:52:00	0.17	75	-12.6
2025-02-17 19:44:00		75	-12.6
2025-02-17 20:30:00		76.6667	-11.6
2025-02-17 21:33:00	0.156	80.8333	-13.5
2025-02-17 21:49:00	0.155	75.8333	-15.3
2025-02-17 21:58:00		75	-15.1
2025-02-17 22:35:00		78.3333	-15.5
2025-02-18 12:49:00	0.16	81.6667	-15.3
2025-02-18 13:32:00		75	-4.5
2025-02-18 14:08:00		83.3333	-10.8
2025-02-18 14:35:00		83.3333	-11.2
2025-02-18 15:43:00	0.16	76.6667	-10.5
2025-02-18 15:50:00		76.6667	-9.5
2025-02-18 16:50:00		83.3333	-10
2025-02-18 18:32:00		75	-9.3
2025-02-18 18:57:00		96	-10
2025-02-18 19:39:00	0.285	85.1667	-9.9
2025-02-18 19:50:00		73.3333	-14.3
2025-02-18 20:43:00		85	-12.4
2025-02-19 12:52:00		66.6667	-14.4
2025-02-19 13:28:00		75	-8.4
2025-02-19 13:57:00		78.3333	-8.4
2025-02-19 14:43:00		75	-7.6
2025-02-19 15:29:00		66.6667	-7.1
2025-02-19 16:00:00		86.6667	-6.7
2025-02-19 17:00:00		66.6667	-7.1
2025-02-19 18:07:00		90	-7.6
2025-02-19 19:24:00		70	-8
2025-02-19 20:38:00		61.6667	-8.8
2025-02-19 21:45:00		61.6667	-9
Test data of DFCS in Antarctica, corresponding to Figure 10
