# Supplementary material for: Experiences and Lessons Learned from Designing and Testing of an Air System and a Drilling Fluid Circulation System Adapted for Subglacial Bedrock Sampling in Antarctica
Source: Copernicus journal article supplement (doi:10.5194/gi-14-277-2025), 2025-10-22
Supplement: Supplementary file [file gi-14-277-2025-supplement-title-page.pdf › gi-14-277-2025-supplement-title-page.pdf]

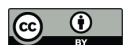

## *Supplement of*

# **Experiences and Lessons Learned from Designing and Testing of an Air System and a Drilling Fluid Circulation System Adapted for Subglacial Bedrock Sampling in Antarctica**

**Yazhou Li et al.**

*Correspondence to:* Kai Zhang ([zhangkai66@cugb.edu.cn](mailto:zhangkai66@cugb.edu.cn))

- [gi-14-277-2025-supplement-title-page.pdf](#)
- [egusphere-2025-2208-supplement-version2](#)
  - [Table S1.xlsx](#)
  - [Table S2.xlsx](#)

The copyright of individual parts of the supplement might differ from the article licence.
